# Supplementary material
Source: PubMed Central journal article supplement (PMC3137455)

## Supplemental Methods

### *Cholesterol efflux study with bone marrow macrophages*

Bone marrow macrophages (BMMs) were isolated from femurs and tibias and cultured in Dulbecco modification of Eagle media (DMEM) supplemented with 10 % fetal bovine serum (FBS) and 30 % L929 conditioned medium for 7 days<sup>1</sup>. BMMs were grown in 12-well Petri dishes, labeled with 5  $\mu\text{Ci/ml}$  [<sup>3</sup>H]-cholesterol, and loaded with or without 25  $\mu\text{g/ml}$  acetylated LDL (acLDL). Twenty-four hours later, cells were washed and equilibrated overnight in DMEM-0.2% bovine serum albumin (BSA) with or without 10  $\mu\text{M}$  GW3965. The cells were washed with PBS and cholesterol efflux was initiated by the addition of DMEM-0.2 % BSA with or without 25  $\mu\text{g/mL}$  HDL3. After 4 hours incubation, aliquots of the medium were filtered by MultiScreen-HV filter plates from Millipore to remove the floating cells and the supernatants were counted in a liquid scintillation counter (LSC). The cells were extracted with 2-propanol, evaporated under nitrogen gas, resuspended in toluene, and counted in an LSC. Cholesterol efflux was expressed as percentage of total tritium radioactivity presented in the cells plus the effluxed medium.

### *Hepatic Triglyceride and Cholesterol Measurements*

Livers were perfused and homogenized in saline using 3 ml/g liver. The homogenates were diluted 5X with PBS and lipids solubilized at 37 degrees for 5 minutes in 1 % deoxycholate for triglyceride or 0.25 % deoxycholate for cholesterol. Triglyceride and cholesterol levels were measured with the use of diagnostic reagents from Thermo Scientific.

## Reference

1. Schiller NK, Black AS, Bradshaw GP, Bonnet DJ, Curtiss LK. Participation of macrophages in atherosclerotic lesion morphology in LDLr<sup>-/-</sup> mice. *J Lipid Res.* 2004;45:1398-1409.

## **Supplemental legends**

**Supplemental Figure I.** Structure of systemic LXR agonist GW3965 and intestine-specific LXR agonist GW6340.

**Supplemental Figure II.** BMMs from wild-type (WT) or LXR DKO mice were labeled with [3H]-cholesterol and loaded with or without 25 µg/ml acetylated LDL (acLDL) for 24 hours. Cells were equilibrated for 18 hours in the presence or absence of 1 µM (GW3965). Cholesterol efflux was determined in the absence (A) or presence of HDL3(25 µg/ml) (B) for 4 hours. Data are expressed as mean ± SD; n = 3. \*\**P* < 0.01.

**Table I . Effects of 5-day GW3965 treatment on plasma lipid levels**

| <b>Mice</b>      | <b>Drug</b>    | <b>Total cholesterol</b> | <b>HDL cholesterol</b> | <b>Triglyceride</b> |
|------------------|----------------|--------------------------|------------------------|---------------------|
| <b>Wild type</b> | <b>Vehicle</b> | 96.8 ± 9.6               | 73 ± 9.7               | 61.7 ± 18.9         |
|                  | <b>GW3965</b>  | 142.8 ± 14.6 **          | 110.8 ± 12.2 **        | 68.7 ± 13.6         |
| <b>LXR KO</b>    | <b>Vehicle</b> | 102.2 ± 12.5             | 68.8 ± 11              | 33.3 ± 9.9 §§       |
|                  | <b>GW3965</b>  | 98.5 ± 15.1              | 65.3 ± 23.6            | 33 ± 7.4 §§         |

Values are means ± SD in mg per 100 mL plasma. In each group, n=6 samples were determined. See Methods for details on diets and lipid analysis. \*\*p<0.01 vs vehicle group. §§p<0.01 vs wild type mice.

**Table II . Effects of 12-day GW3965 and GW6340 treatment on hepatic lipid levels**

| <b>Mouse</b>     | <b>Drug</b>    | <b>Cholesterol</b> | <b>Triglyceride</b> |
|------------------|----------------|--------------------|---------------------|
| <b>Wild type</b> | <b>Vehicle</b> | 3.11 ± 0.42        | 4.3 ± 0.5           |
| <b>Wild type</b> | <b>GW6340</b>  | 3.18 ± 0.72        | 4.0 ± 1.34          |
| <b>Wild type</b> | <b>GW3965</b>  | 2.91 ± 0.33        | 7.14 ± 1.03 **      |

Values are means ± SD in mg per g liver. In each group, n=5 samples were determined. See Methods for details on lipid analysis. \*\*p<0.01 vs vehicle and GW6340 group.

**Table III . Effects of 5-day GW3965 and GW6340 treatment on plasma lipid levels**

| <b>Mice</b>      | <b>Drug</b>    | <b>Total cholesterol</b> | <b>HDL cholesterol</b> | <b>Triglyceride</b> |
|------------------|----------------|--------------------------|------------------------|---------------------|
| <b>Wild type</b> | <b>Vehicle</b> | 89 ± 4.3                 | 56.8 ± 7.4             | 44 ± 7.4            |
| <b>Wild type</b> | <b>GW6340</b>  | 107.9 ± 23.5             | 62.5 ± 10.5            | 47.5 ± 16           |
| <b>Wild type</b> | <b>GW3965</b>  | 131.5 ± 15.7 **          | 100.3 ± 15.9 **§§      | 51.3 ± 10.4         |

Values are means ± SD in mg per 100 mL plasma. In each group, n=5 samples were determined. See Methods for details on diets and lipid analysis. \*\*p<0.01 vs vehicle group. §§p<0.01 vs GW6340 group

**Table IV . Effects of 5-day GW3965 treatment on plasma lipid levels**

| <b>BMM</b>     | <b>Drug</b>    | <b>Total cholesterol</b>  | <b>HDL cholesterol</b>    | <b>Triglyceride</b> |
|----------------|----------------|---------------------------|---------------------------|---------------------|
| <b>WT</b>      | <b>Vehicle</b> | 82.3 ± 4.6                | 67 ± 5.0                  | 44.5 ± 11.2         |
| <b>WT</b>      | <b>GW3965</b>  | 132.2 ± 9.4 <sup>**</sup> | 107.7 ± 8.6 <sup>**</sup> | 49.7 ± 12.7         |
| <b>LXR DKO</b> | <b>Vehicle</b> | 87.5 ± 6.8                | 71 ± 7.1                  | 42.2 ± 14.2         |
| <b>LXR DKO</b> | <b>GW3965</b>  | 130.0 ± 6.7 <sup>**</sup> | 105.2 ± 5.2 <sup>**</sup> | 46.5 ± 8.4          |

Values are means ± SD in mg per 100 mL plasma. In each group, n=6 samples were determined. See Methods for details on diets and lipid analysis. WT and LXR DKO indicates BMMs from wild-type mice and LXR DKO mice, respectively. \*\*p<0.01 vs vehicle group.

## Supplemental Figure.I

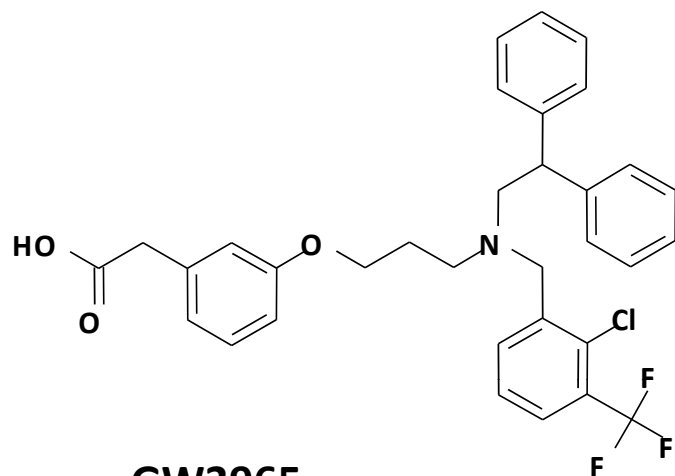

**GW3965**

LXR transactivation pEC50=6.7

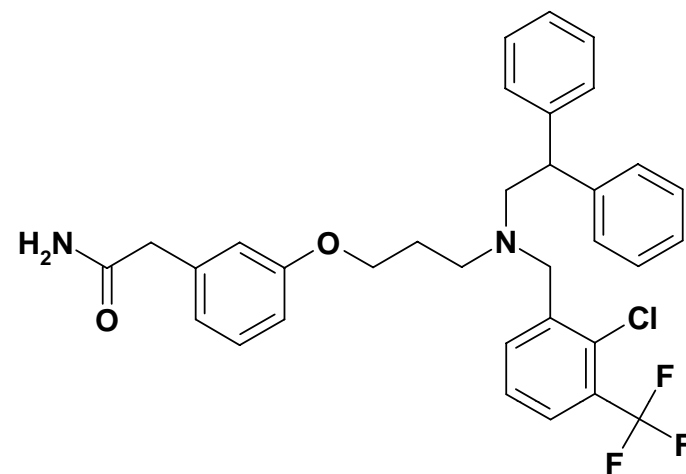

**GW6340**

LXR transactivation pEC50=7

## Supplemental Figure II

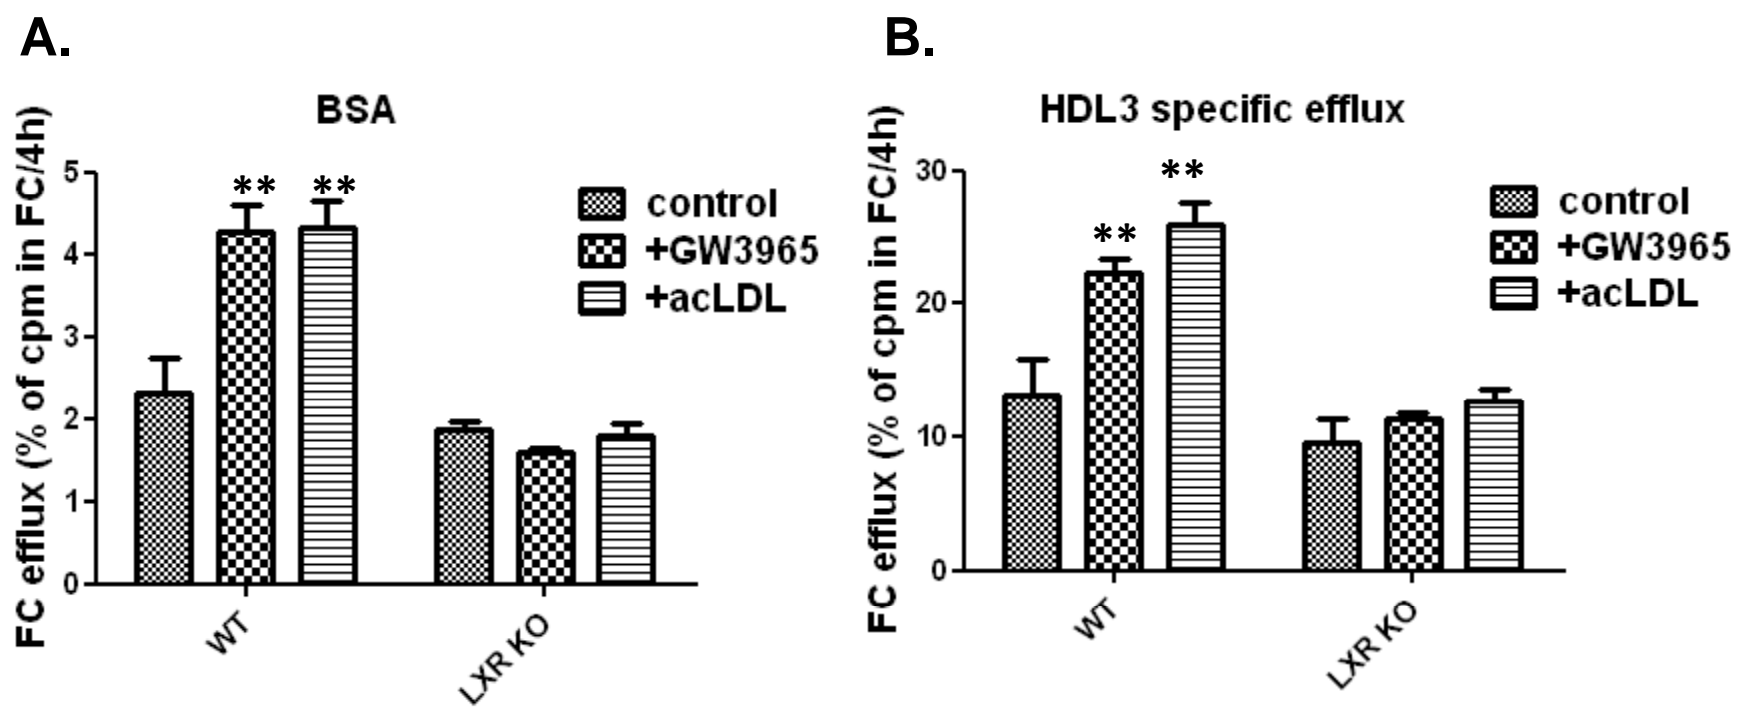

Supplement: NIHMS181037-supplement-Supp1.pdf [file NIHMS181037-supplement-Supp1.pdf]
